# Supplementary material for: High Thyroid Stimulating Hormone Level Is Associated With Hyperandrogenism in Euthyroid Polycystic Ovary Syndrome (PCOS) Women, Independent of Age, BMI, and Thyroid Autoimmunity: A Cross-Sectional Analysis
Source: Front Endocrinol (Lausanne). 2019 Apr 10;10:222. doi: 10.3389/fendo.2019.00222 (PMC6467931; doi:10.3389/fendo.2019.00222)
Supplement: Supplementary file 2 [file Table_2.xlsx]

## Sheet: table S2
Table S2 Clinical and biochemical characteristics in PCOS patients with AIT by TSH level
Characteristicsa	Group 1 b (n=72)	Group 2（n=47）	P
Age(years)	27.45±5.38	27.86±4.16	0.82
BMI(kg/m2)	26.17±5.18	26.67±6.75	0.631
Normal BMI	33 (42.86)	20 (42.55)	0.892
overweight	23 (29.87)	17 (36.17)
obese	16 (20.78)	10 (21.28)
WC（cm）	85.92±12.68	86.22±12.65	0.753
WHR	0.84±0.07	0.87±0.07	0.799
TSH	1.53±0.78	3.44±0.65	<0.001
Type
HA-O-PCO	19 (26.3)	12 (25.53)	0.857
O-HA	12 (16.60)	8 (17.02)
PCO-HA	7 (9.7)	7 (14.89)
PCO-O	34 (47.20)	20 (42.55)
HA phenotype	40 (55.50)	26(55.32)	0.656
TGAB (+)	65 (90.20)	41(87.23)	0.719
TPOAB (+)	35 (48.61)	24(51.06)	0.282
TG(mmol/L)	1.31(0.99-1.75)	2.19 (1.34-2.87)	0.029
Tch(mmol/L)	4.76±0.96	5.03±1.10	0.071
HDL(mmol/L)	1.32±0.40	1.37±0.44	0.41
LDL(mmol/L)	2.72±0.68	2.87±0.74	0.124
apoA	206.59 (46-303.17)	231.41 (52-350.1)	0.557
apoB	0.91±0.25	1.02±0.31	0.165
LH(IU/L)	8.98±6.99	7.95±5.91	0.359
FSH(IU/L)	6.12±2.66	6.31±2.01	0.451
LH/FSH	1.59±0.88	1.28±0.81	0.068
PRL(ug/L)	17.2 ( 9.65-22.87)	15.11 (10.87-21.09)	0.554
E2(pmol/L)	279.61 (172.61-330.87)	265.81 (189.09-450.42)	0.632
T(nmol/L)	2.30±0.89	2.20±1.02	0.512
FT	43.45±20.09	44.51±22.61	0.761
FAI	8.76 (4.49-10.32)	9.46 (5.49-11.02)	0.18
A2(ug/dL)	4.31±2.16	4.15±2.08	0.831
SHBG(nmol/L)	36.99 (20.76-48.67)	35.71 (24.87-50.18)	0.69
DHEAs(ng/mL)	258.01 (105.77-314.12)	251.01(120.3-402.90)	0.901
mean ovary volume(ml)	11.27±4.87	10.71±4.51	0.623
Abbreviations: WC, waist circumference; WHR, waist to hip ratio; HA, hyperandrogenism; AIT, autoimmune-thyroiditis; FT, free testosterone; FAI, free androgen index; SHBG, sex hormone binding globulin; DHEAs, dehydroepiandrosterones. a Continuous data are shown as mean±sd or medians (IQR) and categorical variables as n (%). b Group 1, 0.25≤TSH≤2.5 mU/L; Group 2, 2.5<TSH≤5.0 mU/L
